# Supplementary material for: Unique structure and function of viral rhodopsins
Source: PubMed Central journal article supplement (PMC6821725; doi:10.1038/s41467-019-12718-0), 2019-10-30
Supplement: 41467_2019_12718_MOESM4_ESM.pdf [file 41467_2019_12718_MOESM4_ESM.pdf]

**Title: Supplementary Data 1**

**Description:** Sequence alignment of viral rhodopsins group II. An alignment of 213 identified complete or partial sequences of group II viral rhodopsins including 5 previously reported.
